# Supplementary material for: pH-Responsive Pesticide-Loaded Hollow Mesoporous Silica Nanoparticles with ZnO Quantum Dots as a Gatekeeper for Control of Rice Blast Disease
Source: MDPI journal article supplement (doi:10.3390/ma17061344), 2024-03-14
Supplement: s1 [file s1]

## **Supporting Information**

# **pH-Responsive Pesticide-Loaded Hollow Mesoporous Silica Nanoparticles with ZnO Quantum Dots as a Gatekeeper for Control of Rice Blast Disease**

Yi Zhao, Yanning Zhang, Yilin Yan, Zunyao Huang, Yuting Zhang, Xiaoli Wang\* and Nandi Zhou\*

The Key Laboratory of Carbohydrate Chemistry and Biotechnology, Ministry of Education, School of Biotechnology, Jiangnan University, Wuxi 214122, China

\*Corresponding authors. E-mail addresses: [xiaoliwang@jiangnan.edu.cn](mailto:xiaoliwang@jiangnan.edu.cn) (X. Wang); [zhounandi@jiangnan.edu.cn](mailto:zhounandi@jiangnan.edu.cn) (N. Zhou)

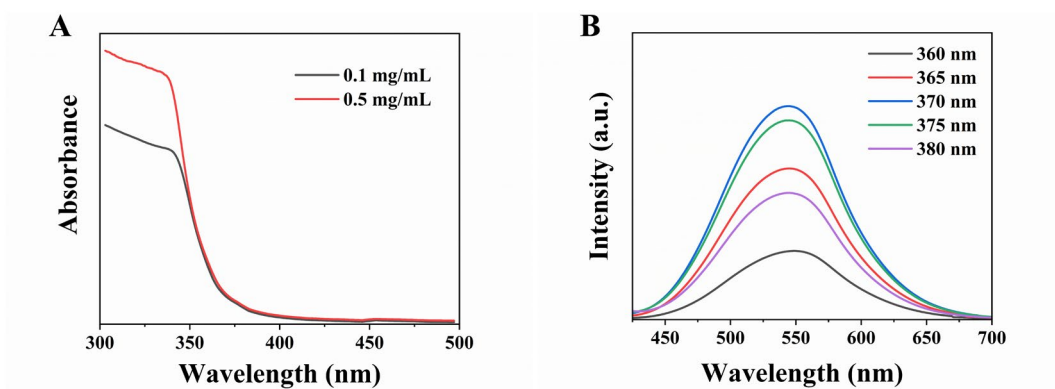

**Figure S1.** (A) UV-vis absorption spectra of ZnO QDs at different concentrations. (B) Fluorescence spectra of ZnO QDs at different excitation wavelength.

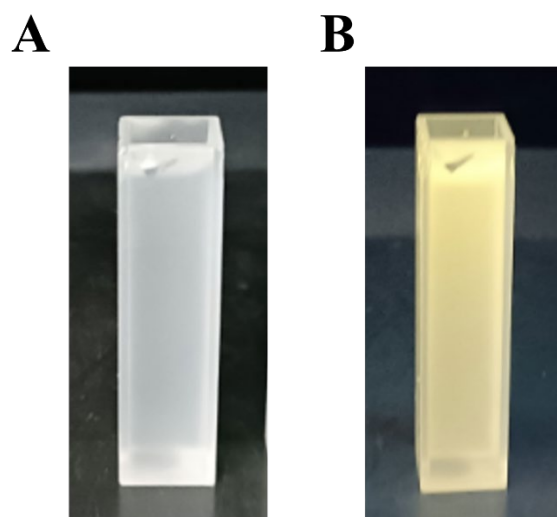

**Figure S2.** Digital images of ZnO QDs under daylight (A) and 365 nm UV lamp (B).

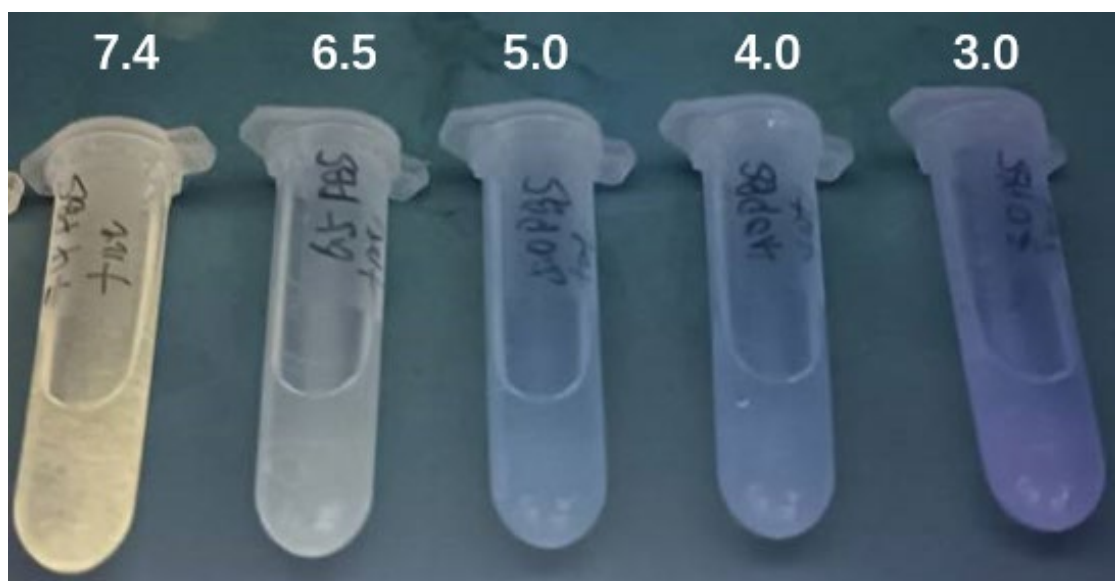

**Figure S3.** Dissolution of ZnO QDs in PBS at different pH.

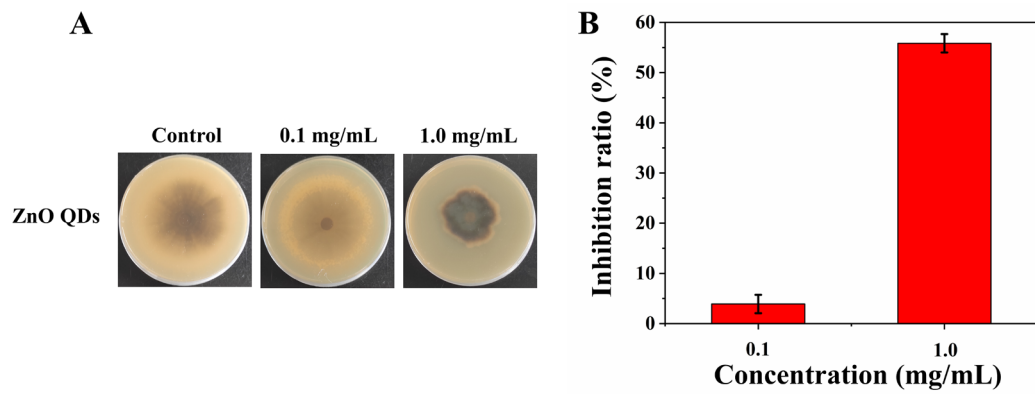

**Figure S4.** (A) Images of *M. oryzae* treated with different concentration of ZnO QDs for 13 days. (B) Inhibition ratio of *M. oryzae* treated with different concentration of ZnO QDs for 13 days.

**Table S1.** Release kinetic equations of HMSNs@Pro at different pH.

| pH  | Models        | Fitting equation        | R <sup>2</sup> |
|-----|---------------|-------------------------|----------------|
| 5.0 | Zero-order    | $y=1.20\ x +21.68$      | 0.5957         |
|     | Higuchi       | $y=10.35\ x^{1/2}+6.33$ | 0.8755         |
|     | Ritger-Peppas | $y=17.93\ x^{0.36}$     | 0.9237         |
| 6.5 | Zero-order    | $y=1.31\ x +22.61$      | 0.6077         |
|     | Higuchi       | $y=11.25\ x^{1/2}+6.05$ | 0.9151         |
|     | Ritger-Peppas | $y=18.59\ x^{0.37}$     | 0.9237         |
| 7.4 | Zero-order    | $y=0.90\ x +29.13$      | 0.3273         |
|     | Higuchi       | $y=8.74\ x^{1/2}+14.88$ | 0.6694         |
|     | Ritger-Peppas | $y=25.99\ x^{0.25}$     | 0.8448         |

**Table S2.** Release kinetic equations of HMSNs@Pro@ZnO QDs at different pH.

| pH  | Models        | Fitting equation      | R <sup>2</sup> |
|-----|---------------|-----------------------|----------------|
| 5.0 | Zero-order    | $y=0.93 x +13.63$     | 0.6756         |
|     | Higuchi       | $y=7.80 x^{1/2}+2.41$ | 0.9152         |
|     | Ritger-Peppas | $y=10.96 x^{0.41}$    | 0.9357         |
| 6.5 | Zero-order    | $y=0.64 x +9.13$      | 0.7424         |
|     | Higuchi       | $y=5.26 x^{1/2}+1.74$ | 0.9496         |
|     | Ritger-Peppas | $y=7.28 x^{0.42}$     | 0.9637         |
| 7.4 | Zero-order    | $y=0.27 x +8.68$      | 0.4102         |
|     | Higuchi       | $y=2.49 x^{1/2}+4.74$ | 0.7425         |
|     | Ritger-Peppas | $y=7.97 x^{0.23}$     | 0.9306         |

**Table S3.** Fungicidal activity of Pro technical and HMSNs@Pro@ZnO QDs against *M. oryzae*.

| Group             | Regression equation | EC <sub>50</sub> | R <sup>2</sup> | 95% Confidence limits |
|-------------------|---------------------|------------------|----------------|-----------------------|
| Pro technical     | y=2.292+2.171x      | 0.088            | 0.987          | 0.076-0.103           |
| HMSNs@Pro@ZnO QDs | y=2.677+2.339x      | 0.072            | 0.979          | 0.063-0.082           |



**Table S4.** Effects of Pro technical, HMSNs@Pro@ZnO QDs and 0.1% tween-80 on the lesion development by *M. oryzae* on rice leaves.

| Group             | Concentration<br>(µg/mL) | Lesion length<br>(cm <sup>2</sup> ) | Control efficacy<br>(%) |
|-------------------|--------------------------|-------------------------------------|-------------------------|
| Pro technical     | 100                      | 0.454                               | 86.72                   |
| HMSNs@Pro@ZnO QDs | 100                      | 0.362                               | 89.40                   |
| Control           | -                        | 3.416                               | -                       |
